# Supplementary material for: Degree of Hydrolysis Regulated by Enzyme Mediation of Wheat Gluten Fibrillation: Structural Characterization and Analysis of the Mechanism of Action
Source: MDPI journal article supplement (doi:10.3390/ijms241713529), 2023-08-31
Supplement: s1 [file s1]

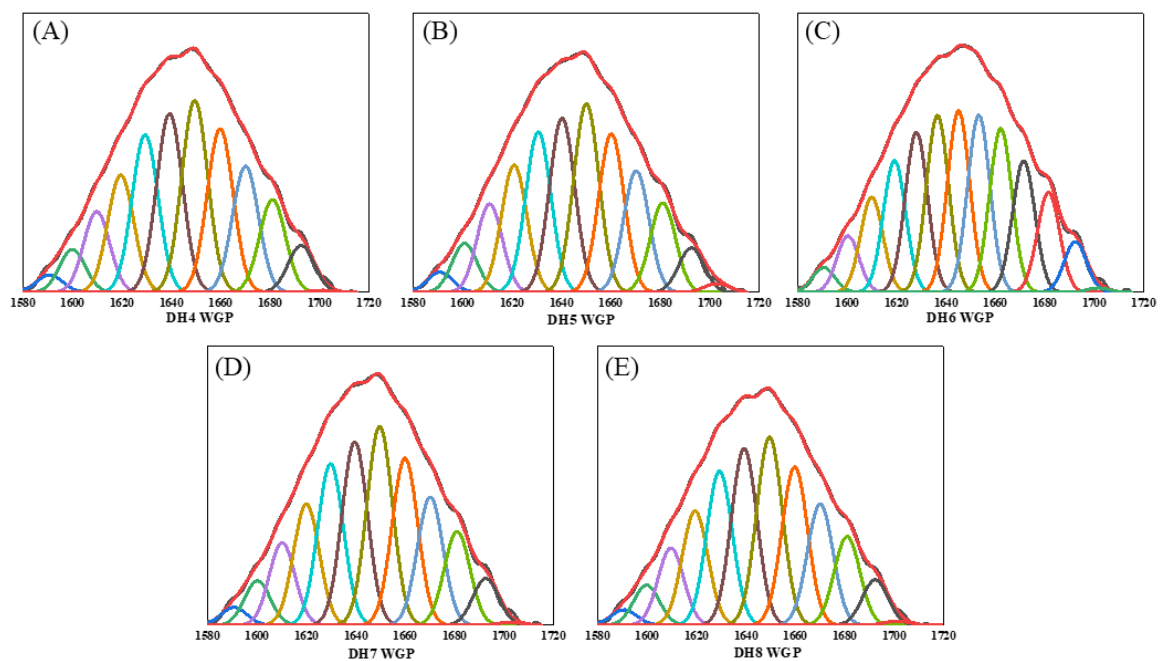

Figure S1. Fitting diagram of the amide I region for DH4-8 WGP.

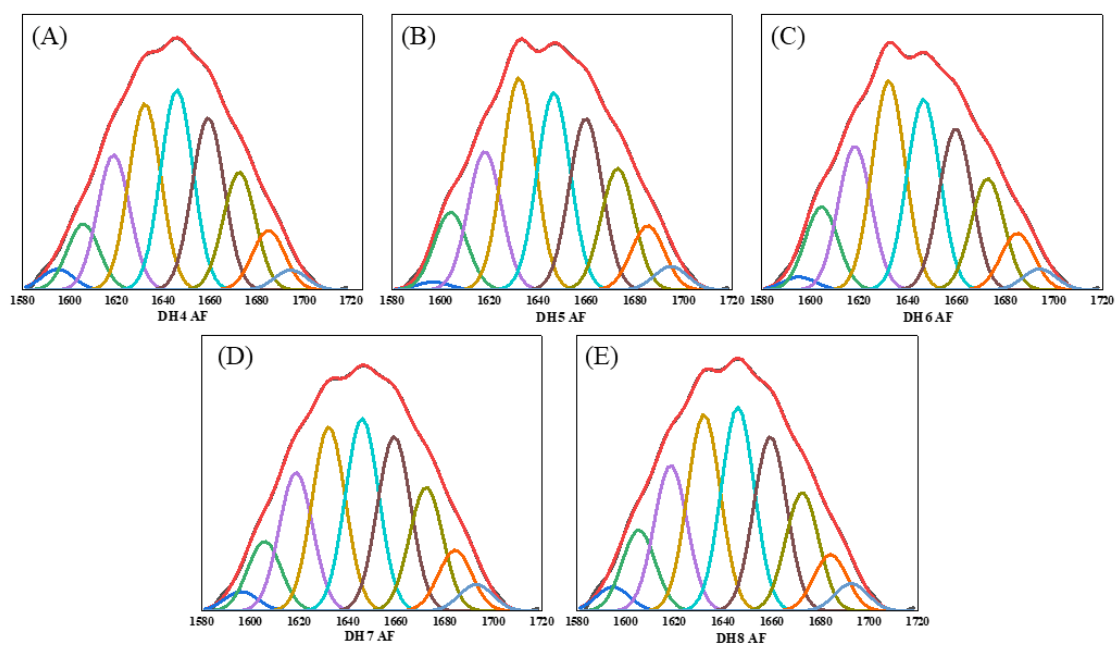

Figure S2. Fitting diagram of the amide I region for DH4-8 AF.
